# Supplementary material for: Horizontal axis wind turbine modelling and data analysis by multilinear regression
Source: Copernicus journal article supplement (doi:10.5194/ms-11-447-2020), 2020-11-23
Supplement: Supplementary file 1 [file ms-11-447-2020-supplement.zip]

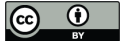

## *Supplement of*

# **Horizontal axis wind turbine modelling and data analysis by multilinear regression**

**Paulaiyan Tittus and Paul Mary Diaz**

*Correspondence to:* Paul Mary Diaz ([pauldiaz71@gmail.com](mailto:pauldiaz71@gmail.com))

- [ms-11-447-2020-supplement-title-page.pdf](#)
- Datas
  - .RData
  - Drag NACA 0012.csv
  - Drag NACA 4412.csv
  - Drag NACA 4415.csv
  - Drag.csv
  - Lift NACA 0012.csv
  - Lift NACA 0012.xlsx
  - Lift NACA 4412.csv
  - Lift NACA 4415.csv
  - Lift.csv
  - N Force NACA 0012.csv
  - N Force NACA 4412.csv
  - N Force NACA 4415.csv
  - N Force.csv
  - NForce4.csv
  - Parameter1.csv
  - Parameter2.xlsx
  - Parameter2\_csv.csv
  - Parameter3.xlsx
  - Parameter3\_csv.csv
  - Parameter4.xlsx
  - Parameter4\_csv.csv

- Pressure D NACA 0012.csv
- Pressure D NACA 4412.csv
- Pressure D NACA 4415.csv
- Pressure D.csv
- Pressure R NACA 0012.csv
- Pressure R NACA 4412.csv
- Pressure R NACA 4415.csv
- Pressure R.csv
- Pressure S NACA 0012.csv
- Pressure S NACA 4412.csv
- Pressure S NACA 4415.csv
- Pressure S.csv
- Pressure T NACA 0012.csv
- Pressure T NACA 4412.csv
- Pressure T NACA 4415.csv
- Pressure T.csv
- T Intensity NACA 0012.csv
- T Intensity NACA 4412.csv
- T Intensity NACA 4415.csv
- T Intensity.csv
- Torque NACA 0012.csv
- Torque NACA 4412.csv
- Torque NACA 4415.csv
- Torque.csv
- Torque4.csv
- Velocity A NACA 0012.csv
- Velocity A NACA 4412.csv
- Velocity A NACA 4415.csv
- Velocity A.csv
- Velocity M NACA 0012.csv
- Velocity M NACA 4412.csv
- Velocity M NACA 4415.csv
- Velocity M.csv
- Velocity R NACA 0012.csv
- Velocity R NACA 4412.csv
- Velocity R NACA 4415.csv
- Velocity R.csv
- VelocityA4.csv
- VelocityM4.csv
- Vorticity NACA 0012.csv
- Vorticity NACA 4412.csv
- Vorticity NACA 4415.csv
- Vorticity.csv
- csv files for R program.csv

The copyright of individual parts of the supplement might differ from the CC BY 4.0 License.
